# Supplementary material for: Electronic structure, absorption spectra and oxidation dynamics in polyynes and dicyanopolyynes
Source: Royal Society of Chemistry journal article supplement (doi:10.1039/d4cp02719a), 2024-01-01
Supplement: d4cp02719a1.pdf [file d4cp02719a1.pdf]

# Journal Name

## ARTICLE TYPE

Cite this: DOI:00.0000/xxxxxxxxxx

## Supporting Material for: Electronic structure, absorption spectra and oxidation dynamics in polyynes and dicyanopolyynes

Lazaros Chalkopiadis,<sup>a</sup> Konstantinos Lambropoulos,<sup>a</sup> Constantinos Simserides<sup>\*a</sup>

Received Date

Accepted Date

DOI:00.0000/xxxxxxxxxx

This is Supporting Material for: Electronic structure, absorption spectra and oxidation dynamics in polyynes and dicyanopolyynes. The matlab code for TB with all valence orbitals can be found in [http://users.uoa.gr/~csimseri/All\\_Valence\\_Orbitals.zip](http://users.uoa.gr/~csimseri/All_Valence_Orbitals.zip). The zip contains also some auxiliary files, including geometries.

### 1 Polyynes

Figure S1 presents the molecular eigenstates of *polnsl* molecules with  $n = 2, 4, 6, 8, 10$ . Eigenenergies together with *character*, i.e., analysis of molecular states into atomic valence states.

Fig. S2 shows a snapshot, for the initial 3 femtoseconds, of the time-dependent probabilities at  $C_1$ ,  $C_3$  and  $C_6$  orbitals, for initial placement of the hole at  $2s$  orbital of  $C_1$ , in *pol6sl*. The  $2p_x$  and  $2p_z$  time-dependent probabilities remain zero. An *sp* path is activated in this case: only  $2s$  and  $2p_y$  orbitals have significant probabilities. In Fig. S3 we show the same quantities for the time interval from 7 to 10 femtoseconds.

Table S1 shows Löwdin Population Analysis, at the B3LYP/STO-3G level of theory, for *pol-n-sl* molecules with  $n = 2, 4, 6, 8, 10$ . Table S2 shows Löwdin Population Analysis (shell charges), for the ground state (GS) and localised hole state (LHS), at carbon atom  $C_1$  of *pol-n-sl* molecules with  $n = 2, 4, 6, 8, 10$ , at the B3LYP/STO-3G level of theory. The difference between GS and LHS is also shown.

Table S1 Löwdin Population Analysis at the B3LYP/STO-3G level of theory for *pol-n-sl* molecules with  $n = 2, 4, 6, 8, 10$ .

| atom      | neutral | <i>pol2sl</i> | <i>pol4sl</i> | <i>pol6sl</i> | <i>pol8sl</i> | <i>pol10sl</i> |
|-----------|---------|---------------|---------------|---------------|---------------|----------------|
| C1        | 6       | 6.08          | 6.06          | 6.05          | 6.05          | 6.05           |
| C2        | 6       | 6.08          | 6.03          | 6.03          | 6.03          | 6.02           |
| C3        | 6       | -             | 6.03          | 6.01          | 6.01          | 6.00           |
| C4        | 6       | -             | 6.06          | 6.01          | 6.01          | 6.01           |
| C5        | 6       | -             | -             | 6.03          | 6.01          | 6.01           |
| C6        | 6       | -             | -             | 6.05          | 6.01          | 6.01           |
| C7        | 6       | -             | -             | -             | 6.03          | 6.01           |
| C8        | 6       | -             | -             | -             | 6.05          | 6.00           |
| C9        | 6       | -             | -             | -             | -             | 6.02           |
| C10       | 6       | -             | -             | -             | -             | 6.05           |
| $H_{n+1}$ | 1       | 0.92          | 0.91          | 0.91          | 0.91          | 0.90           |
| $H_{n+2}$ | 1       | 0.92          | 0.91          | 0.91          | 0.91          | 0.90           |

Table S2 Löwdin Population Analysis (shell charges), for the ground state (GS) and the localised hole state (LHS), at carbon atom  $C_1$  of *pol-n-sl* molecules with  $n = 2, 4, 6, 8, 10$ , B3LYP/STO-3G level of theory. The difference between GS and LHS is also shown.

| Molecule       | Löwdin Population Analysis |      |      |      |
|----------------|----------------------------|------|------|------|
|                | State                      | "1s" | "2s" | "2p" |
| <i>pol2sl</i>  | GS                         | 1.99 | 1.05 | 3.05 |
|                | LHS                        | 1.99 | 0.97 | 2.12 |
|                | GS-LHS                     | 0.00 | 0.08 | 0.93 |
| <i>pol4sl</i>  | GS                         | 1.99 | 1.05 | 3.02 |
|                | LHS                        | 1.99 | 0.98 | 2.09 |
|                | GS-LHS                     | 0.00 | 0.07 | 0.93 |
| <i>pol6sl</i>  | GS                         | 1.99 | 1.06 | 3.01 |
|                | LHS                        | 1.99 | 0.99 | 2.08 |
|                | GS-LHS                     | 0.00 | 0.07 | 0.93 |
| <i>pol8sl</i>  | GS                         | 1.99 | 1.06 | 3.00 |
|                | LHS                        | 1.99 | 0.99 | 2.07 |
|                | GS-LHS                     | 0.00 | 0.07 | 0.93 |
| <i>pol10sl</i> | GS                         | 1.99 | 1.06 | 3.00 |
|                | LHS                        | 1.99 | 0.99 | 2.08 |
|                | GS-LHS                     | 0.00 | 0.07 | 0.92 |

<sup>a</sup> Department of Physics, National and Kapodistrian University of Athens, Panepistimiopolis, Zografos GR-15784, Athens, Greece.

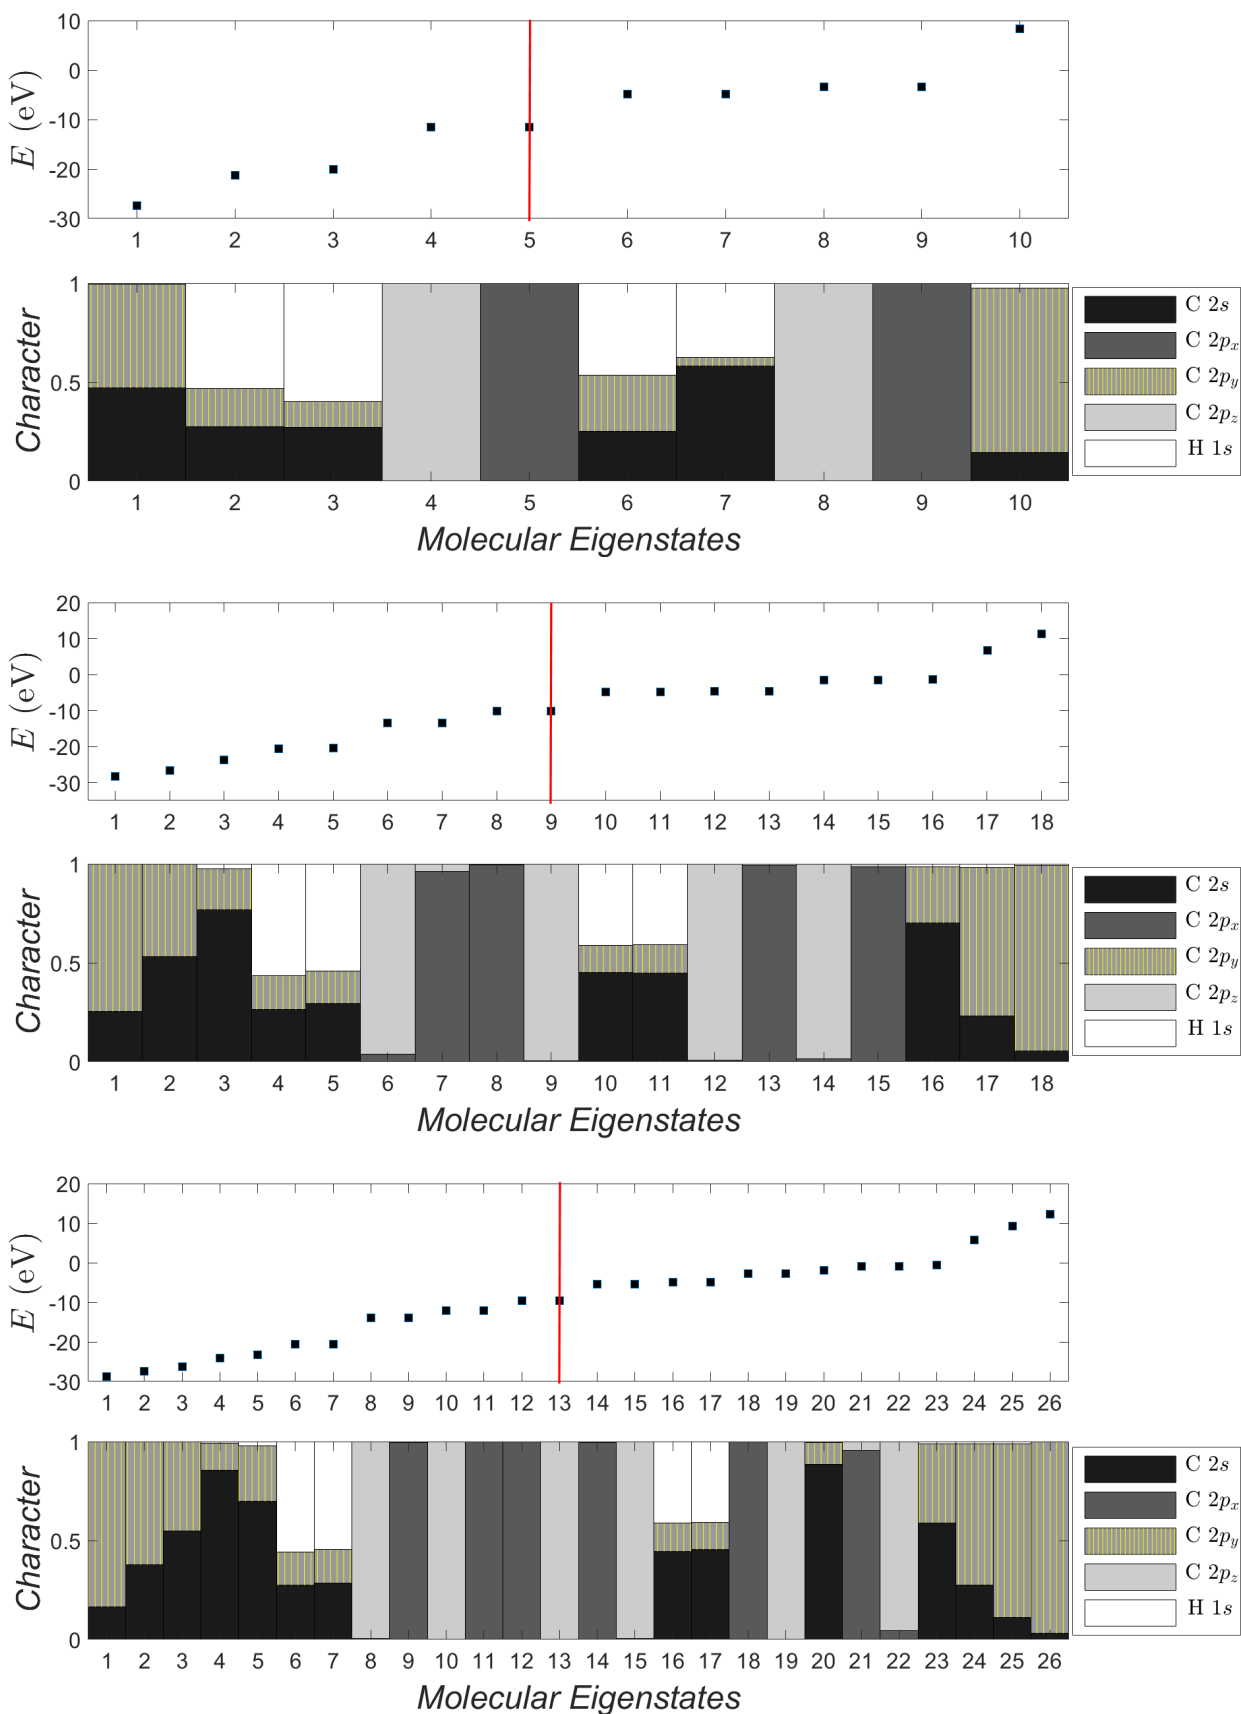

Fig. S1 Molecular eigenstates of *pohsl* molecules with  $n = 2, 4, 6$ . Eigenenergies together with *character*, i.e., analysis of molecular states into atomic valence states.

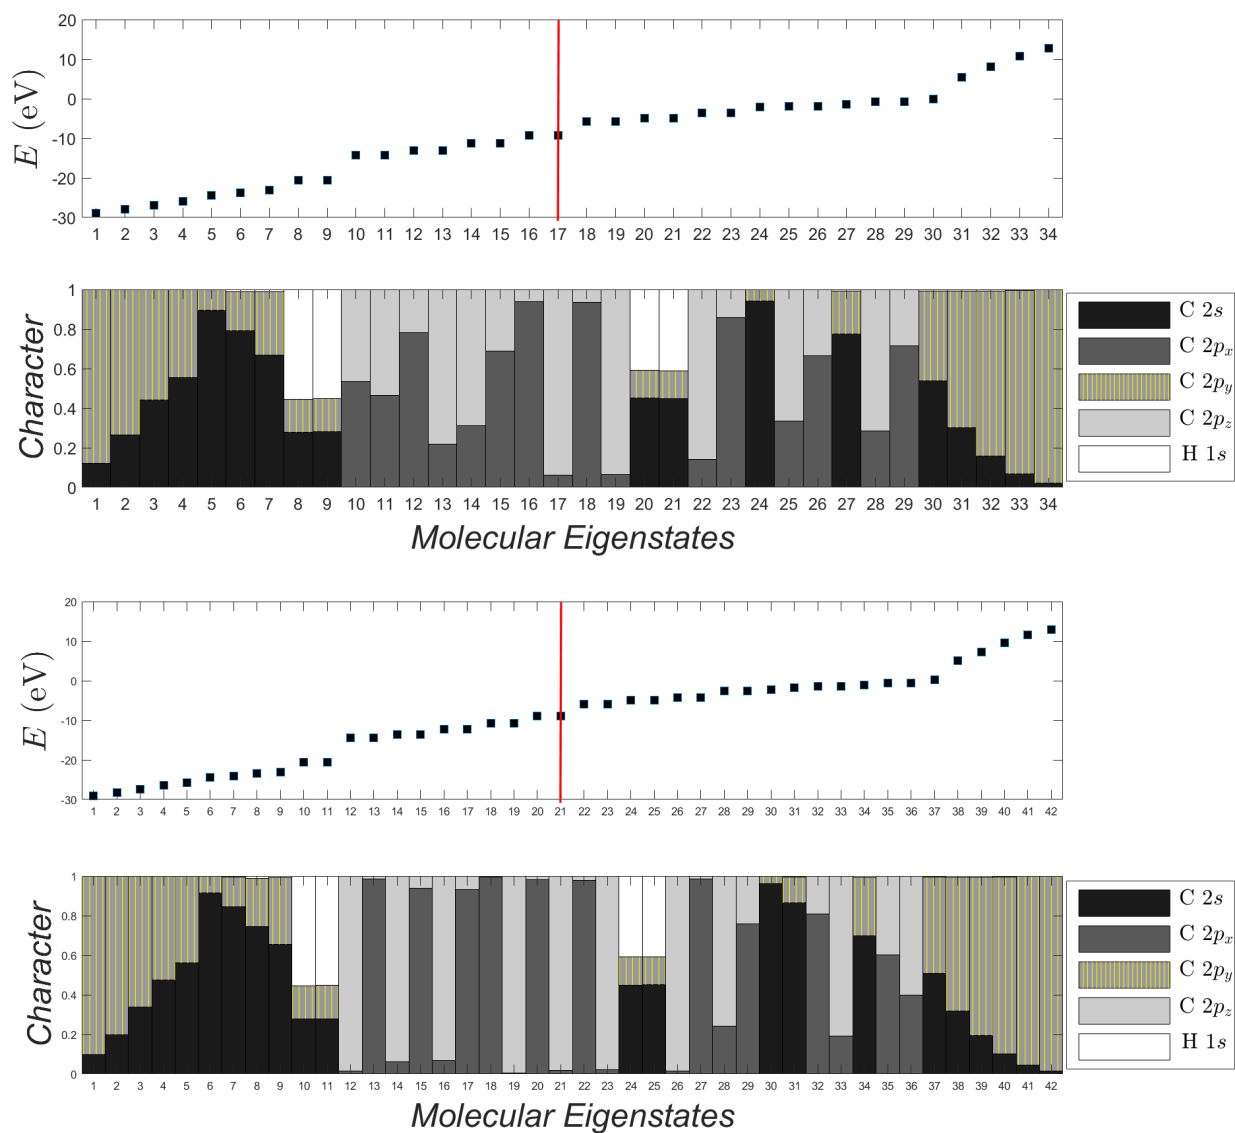

Fig. S1 Molecular eigenstates of *polnsl* molecules with  $n = 8, 10$ . Eigenenergies together with *character*, i.e., analysis of molecular states into atomic valence states.

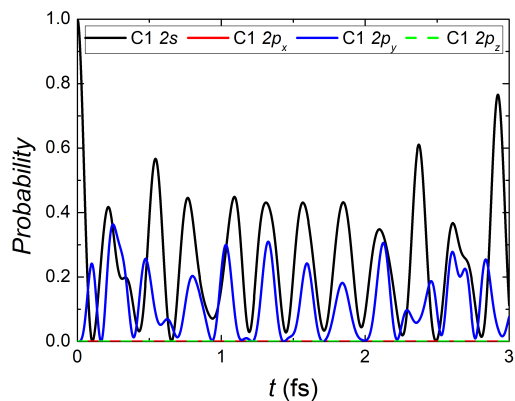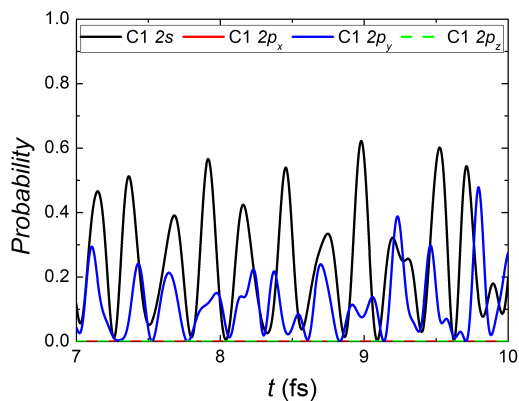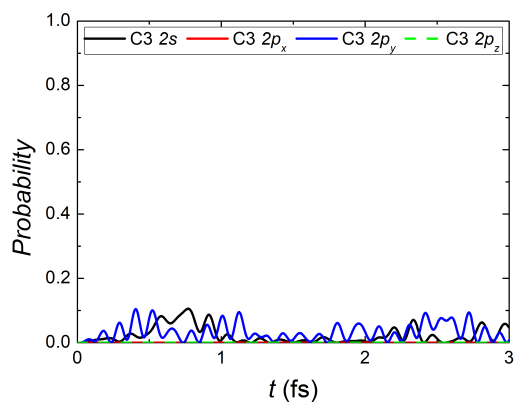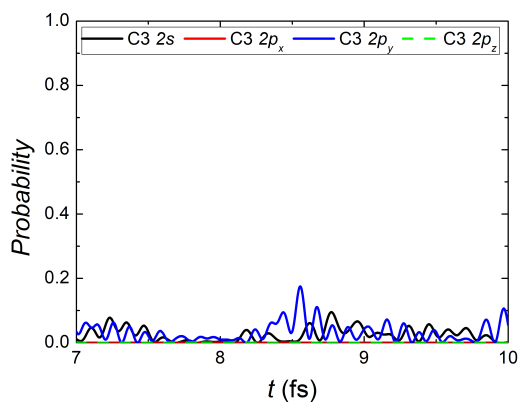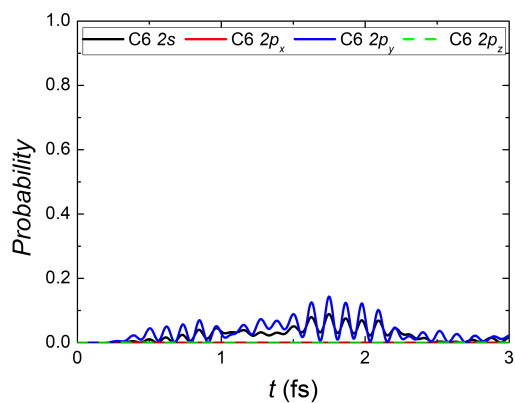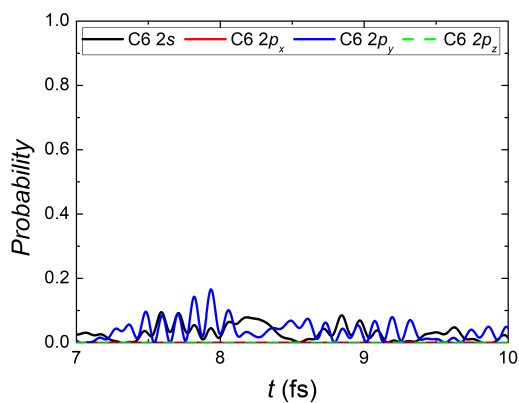

Fig. S2 A snapshot, for the initial 3 femtoseconds, of the time-dependent probabilities at  $C_1$ ,  $C_3$  and  $C_6$  orbitals, for initial placement of the hole at  $2s$  orbital of  $C_1$ , in *pol6sl*. The  $2p_x$  and  $2p_z$  time-dependent probabilities remain zero. An *sp* path is activated in this case: only  $2s$  and  $2p_y$  orbitals have significant probabilities.

Fig. S3 A snapshot, for the time interval from 7 to 10 femtoseconds, of the time-dependent probabilities at  $C_1$ ,  $C_3$  and  $C_6$  orbitals, for initial placement of the hole at  $2s$  orbital of  $C_1$ , in *pol6sl*. The  $2p_x$  and  $2p_z$  time-dependent probabilities remain zero. An *sp* path is activated in this case: only  $2s$  and  $2p_y$  orbitals have significant probabilities.

## 2 Dicyanopolyynes

Figure S4 shows the molecular states of *dicyano-n-polyynes* with  $n = 2, 4, 6, 8, 10$ . Eigenenergies and *character*, i.e., analysis of molecular states into atomic valence states.

Table S3 shows the Löwdin Population Analysis, at the B3LYP/STO-3G level of theory, for *dicyano-n-polyynes* molecules with  $n = 2, 4, 6, 8, 10$ . Table S4 shows the Löwdin Population Analysis (shell charges), for ground state (GS) and localised hole state (LHS), at nitrogen atom  $N_1$  of *dicyano-n-polyynes* with  $n = 2, 4, 6, 8, 10$ , B3LYP/ STO-3G level of theory. The difference between GS and LHS is also shown.

Table S3 Löwdin Population Analysis, at the B3LYP/STO-3G level of theory for *dicyano-n-polyynes* with  $n = 2, 4, 6, 8, 10$ .

| atom      | neutral | <i>dicyano2</i> | <i>dicyano4</i> | <i>dicyano6</i> | <i>dicyano8</i> | <i>dicyano10</i> |
|-----------|---------|-----------------|-----------------|-----------------|-----------------|------------------|
| N1        | 7       | 7.04            | 7.05            | 7.06            | 7.06            | 7.07             |
| C2        | 6       | 5.96            | 5.96            | 5.97            | 5.97            | 5.97             |
| C3        | 6       | 5.96            | 5.98            | 5.99            | 6.00            | 6.00             |
| C4        | 6       | -               | 5.98            | 5.98            | 5.98            | 5.98             |
| C5        | 6       | -               | 5.96            | 5.98            | 5.99            | 5.99             |
| C6        | 6       | -               | -               | 5.99            | 5.99            | 5.99             |
| C7        | 6       | -               | -               | 5.97            | 5.98            | 5.99             |
| C8        | 6       | -               | -               | -               | 6.00            | 5.99             |
| C9        | 6       | -               | -               | -               | 5.97            | 5.98             |
| C10       | 6       | -               | -               | -               | -               | 6.00             |
| C11       | 6       | -               | -               | -               | -               | 5.97             |
| $N_{n+2}$ | 7       | 7.04            | 7.06            | 7.06            | 7.06            | 7.07             |

Table S4 Löwdin Population Analysis (shell charges), for the ground state (GS) and the localised hole state (LHS), at nitrogen atom  $N_1$  of *dicyano-n-polyynes* molecules with  $n = 2, 4, 6, 8, 10$ , B3LYP/ STO-3G level of theory. The difference between GS and LHS is also shown.

| molecule         | Löwdin Population Analysis |      |      |      |
|------------------|----------------------------|------|------|------|
|                  | State                      | "1s" | "2s" | "2p" |
| <i>dicyano2</i>  | GS                         | 2.00 | 1.69 | 3.35 |
|                  | LHS                        | 2.00 | 1.67 | 2.37 |
|                  | GS - LHS                   | 0.00 | 0.02 | 0.98 |
| <i>dicyano4</i>  | GS                         | 2.00 | 1.69 | 3.36 |
|                  | LHS                        | 2.00 | 1.52 | 2.53 |
|                  | GS - LHS                   | 0.00 | 0.17 | 0.83 |
| <i>dicyano6</i>  | Gs                         | 2.00 | 1.69 | 3.37 |
|                  | LHs                        | 2.00 | 1.56 | 2.50 |
|                  | GS - LHS                   | 0.00 | 0.13 | 0.87 |
| <i>dicyano8</i>  | GS                         | 2.00 | 1.69 | 3.37 |
|                  | LHS                        | 2.00 | 1.57 | 2.49 |
|                  | GS - LHS                   | 0.00 | 0.12 | 0.88 |
| <i>dicyano10</i> | GS                         | 2.00 | 1.69 | 3.37 |
|                  | LHS                        | 2.00 | 1.58 | 2.48 |
|                  | GS - LHS                   | 0.00 | 0.11 | 0.89 |

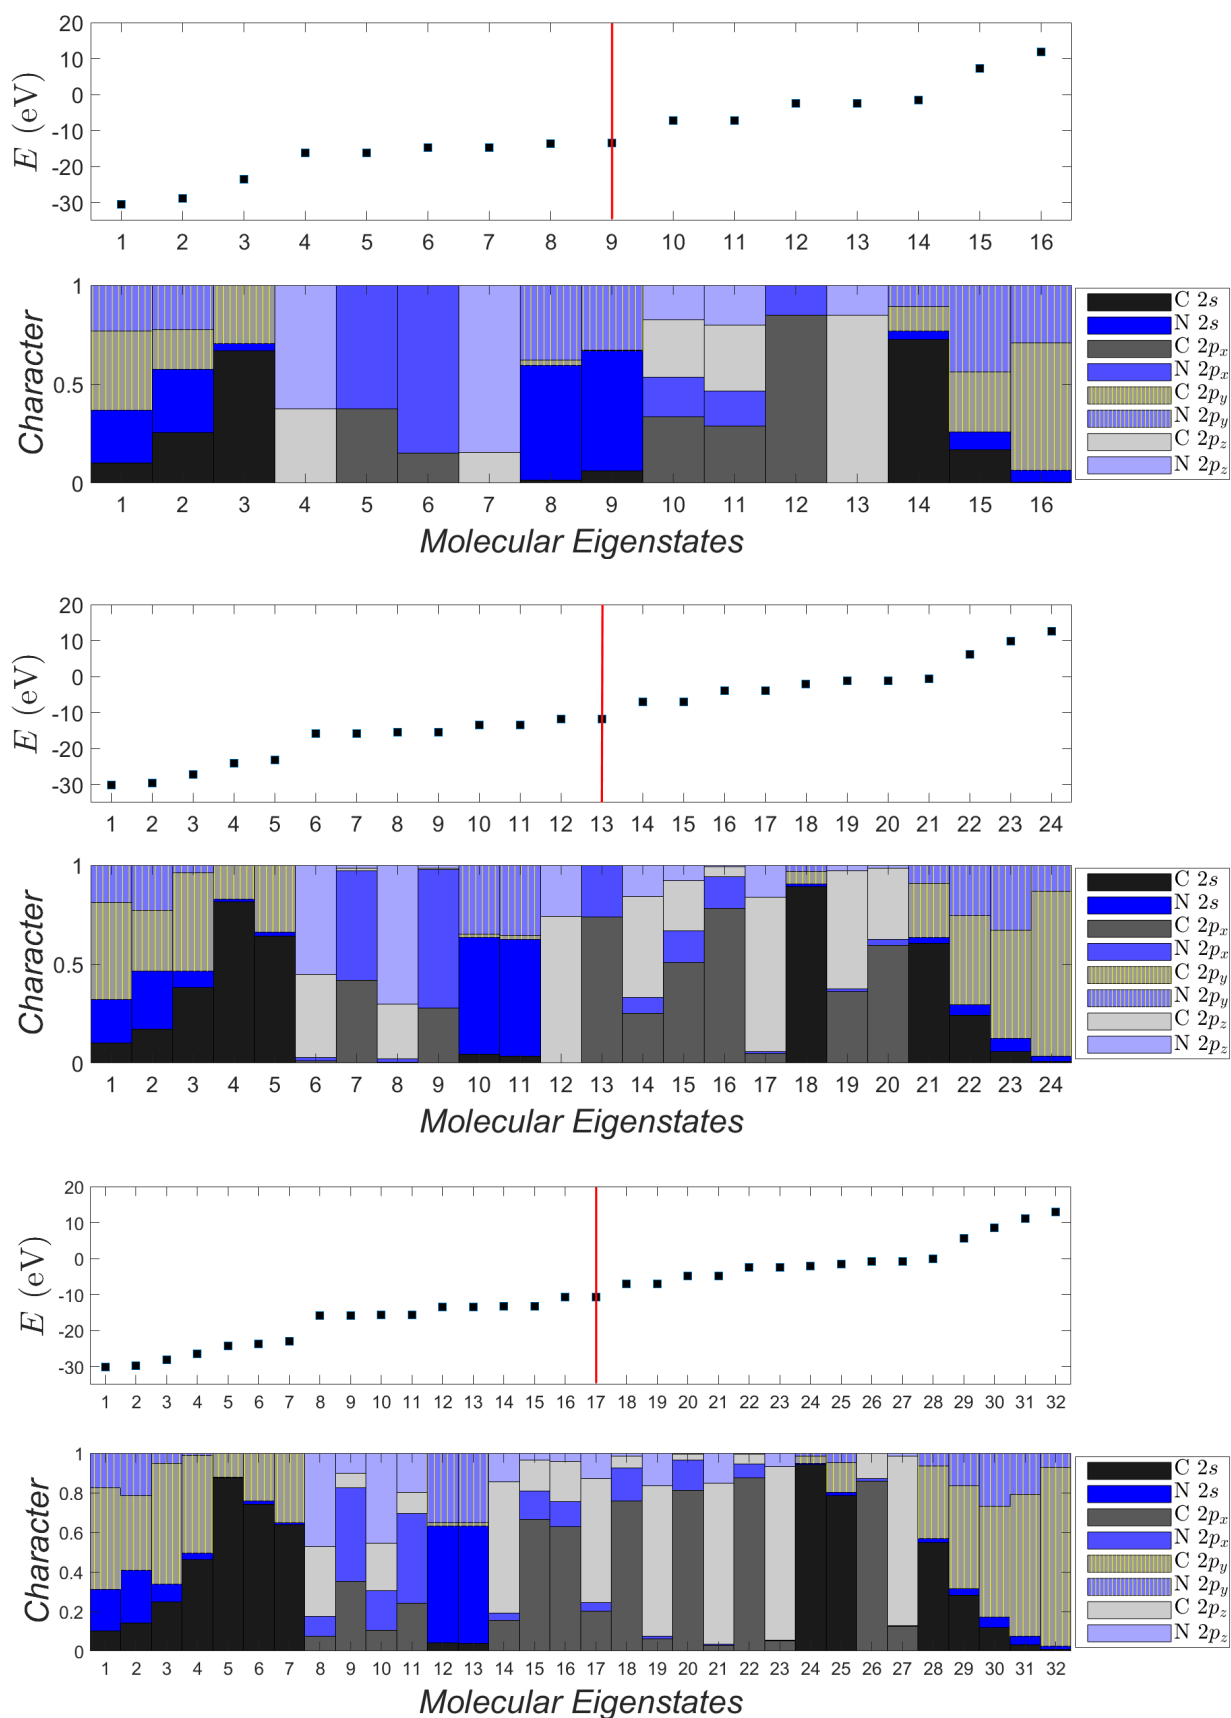

Fig. S4 Molecular eigenstates of *dicyano-n-polynes* with  $n = 2, 4, 6$ . Eigenenergies and *character*, i.e., analysis of molecular states into atomic valence states.

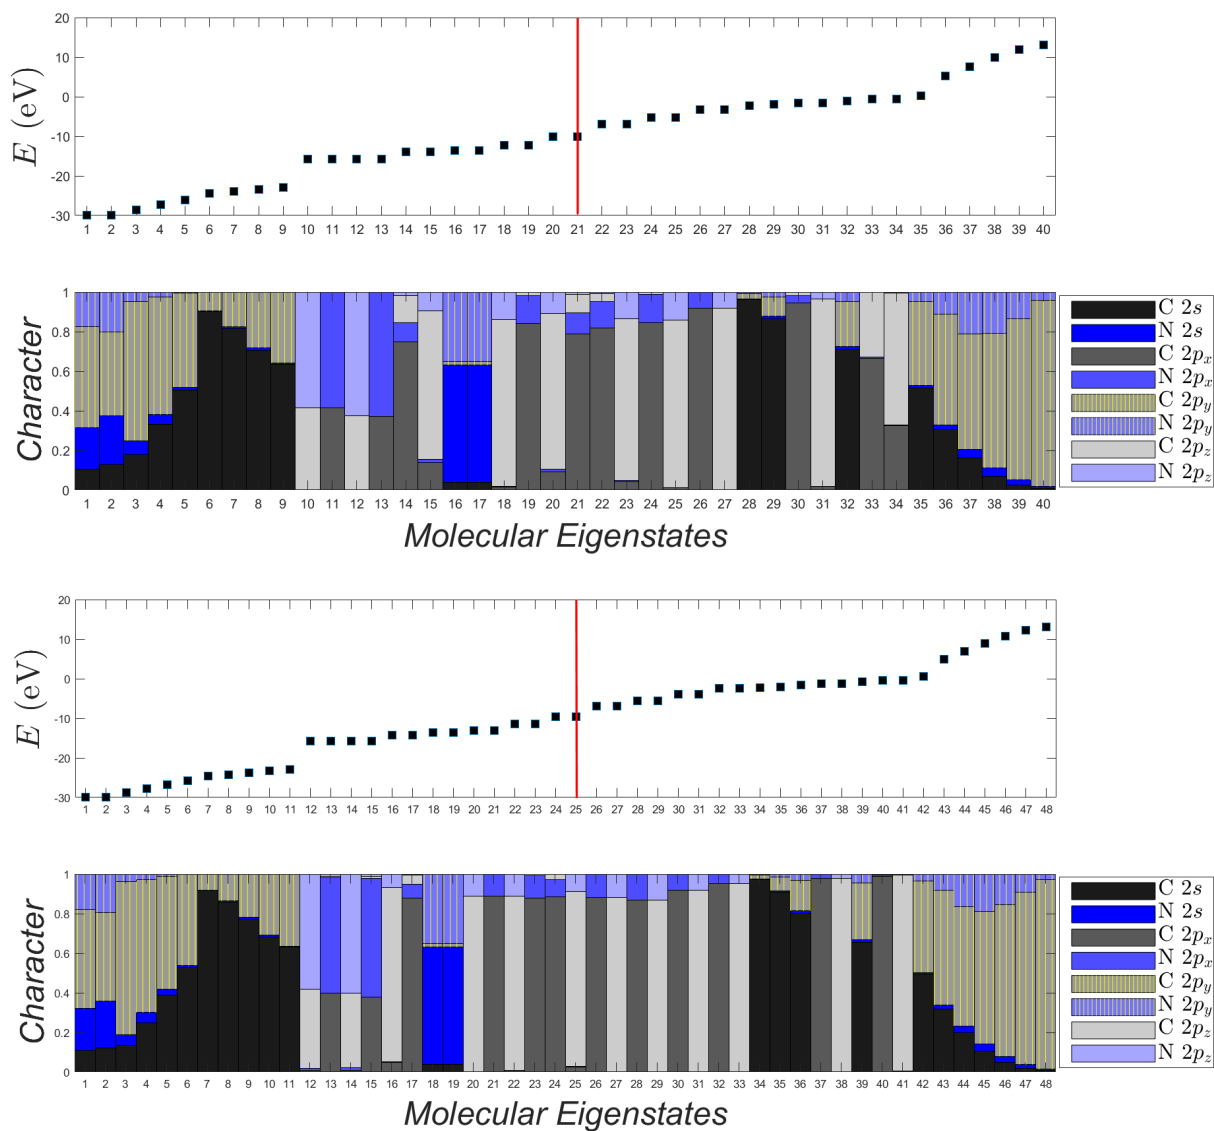

Fig. S4 Molecular eigenstates of *dicyano-n-polyynes* with  $n = 8, 10$ . Eigenenergies and *character*, i.e., analysis of molecular states into atomic valence states.

### 3 Comparison of polyynes to dicyanopolyynes

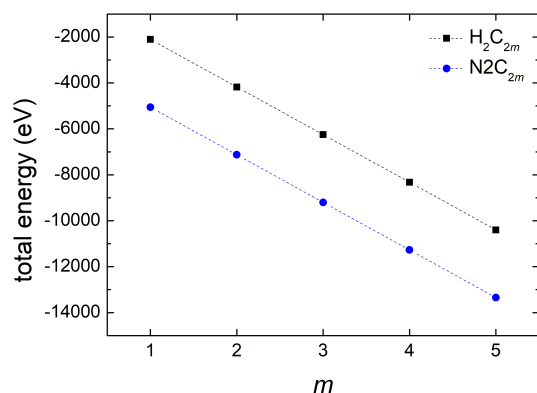

Fig. S5 Total DFT energies of the polyynes ( $H_2C_{2m}$ ) and dicyanopolyynes ( $N_2C_{2m}$ , bottom),  $n = 1, 2, \dots, 5$ , at the B3LYP/cc-pVTZ level of theory.

Results at different levels of theory converge nicely as we increase the basis set. A comparison of the total DFT energies of polyynes ( $H_2C_{2m}$ ) and dicyanopolyynes ( $N_2C_{2m}$ ) is shown in Fig. S5.

The HOMO and LUMO orbital energies of the dicyanopolyynic series ( $N_2C_{2m}$ ),  $m = 1, 2, \dots, 5$ , can be used to obtain the HOMO-LUMO gap. In Fig. S7, we use the largest of the basis sets used, cc-pVTZ, to illustrate the variation of the HOMO-LUMO gap increasing  $m$ .

HOMO-LUMO gaps of polyynes ( $H_2C_{2m}$ ) and dicyanopolyynes ( $N_2C_{2m}$ ),  $n = 1, 2, \dots, 5$ , at the B3LYP/cc-pVTZ level of theory. Total DFT energies of the polyynes ( $H_2C_{2m}$ ) and dicyanopolyynes ( $N_2C_{2m}$ , bottom),  $n = 1, 2, \dots, 5$ , at the B3LYP/cc-pVTZ level of theory.

Contributions (one-electron terms, Coulomb repulsion, exchange correlation, nuclear repulsion) to the total DFT energies of the polyynic series ( $C_{2m}H_2$ , top) and the dicyanopolyynic series ( $C_{2m}N_2$ , bottom), for  $n = 1, 2, \dots, 5$ , using the cc-pVTZ basis set.

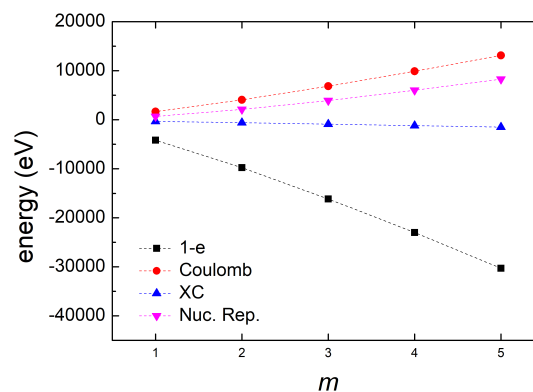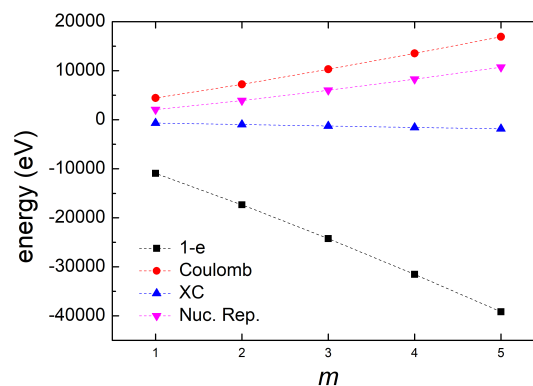

Fig. S6 Contributions (one-electron terms, Coulomb repulsion, exchange correlation, nuclear repulsion) to the total DFT energies of the polyynic series ( $C_{2m}H_2$ , top) and the dicyanopolyynic series ( $C_{2m}N_2$ , bottom), for  $n = 1, 2, \dots, 5$ , using the cc-pVTZ basis set.

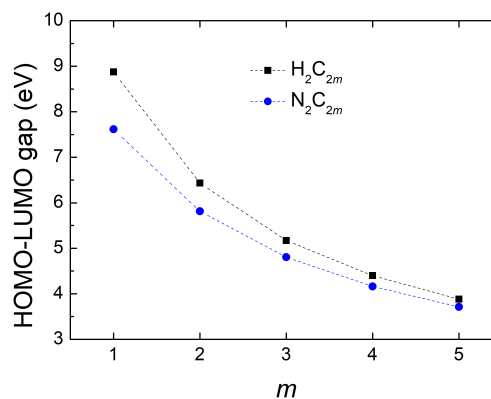

Fig. S7 HOMO-LUMO gaps of polyynes ( $H_2C_{2m}$ ) and dicyanopolyynes ( $N_2C_{2m}$ ),  $n = 1, 2, \dots, 5$ , at the B3LYP/cc-pVTZ level of theory.
